# Supplementary material for: Chondroitin sulfate proteoglycan 4,6 sulfation regulates sympathetic nerve regeneration after myocardial infarction
Source: PubMed Central journal article supplement (PMC9197393; doi:10.7554/elife.78387), 2022-05-23
Supplement: elife-78387-supp1.pdf [file elife-78387-supp1.pdf]

1 Supplemental Data:

2 **Chondroitin Sulfate Proteoglycan 4,6 sulfation regulates sympathetic nerve regeneration after**  
3 **myocardial infarction**

4  
5 Blake MR<sup>1</sup>, Parrish DC<sup>1</sup>, Staffenson MA<sup>1</sup>, Sueda S<sup>1,2</sup>, Woodward WR<sup>1</sup>, Habecker BA<sup>1</sup>

6  
7 <sup>1</sup>Department of Chemical Physiology and Biochemistry, Oregon Health and Science University, Portland,  
8 OR, United States of America, 97239 <sup>2</sup>Portland State University EXITO Scholars Program, Portland State  
9 University, Portland, OR, United States of America, 97201

10

11

12 **Address for Correspondence:**

13 Beth A. Habecker PhD

14 Department of Chemical Physiology and Biochemistry, L334

15 Oregon Health and Science University

16 3181 SW Sam Jackson Park Rd

17 Portland, OR, USA, 97239

18

19

20

21

22

23

24

25

26

27

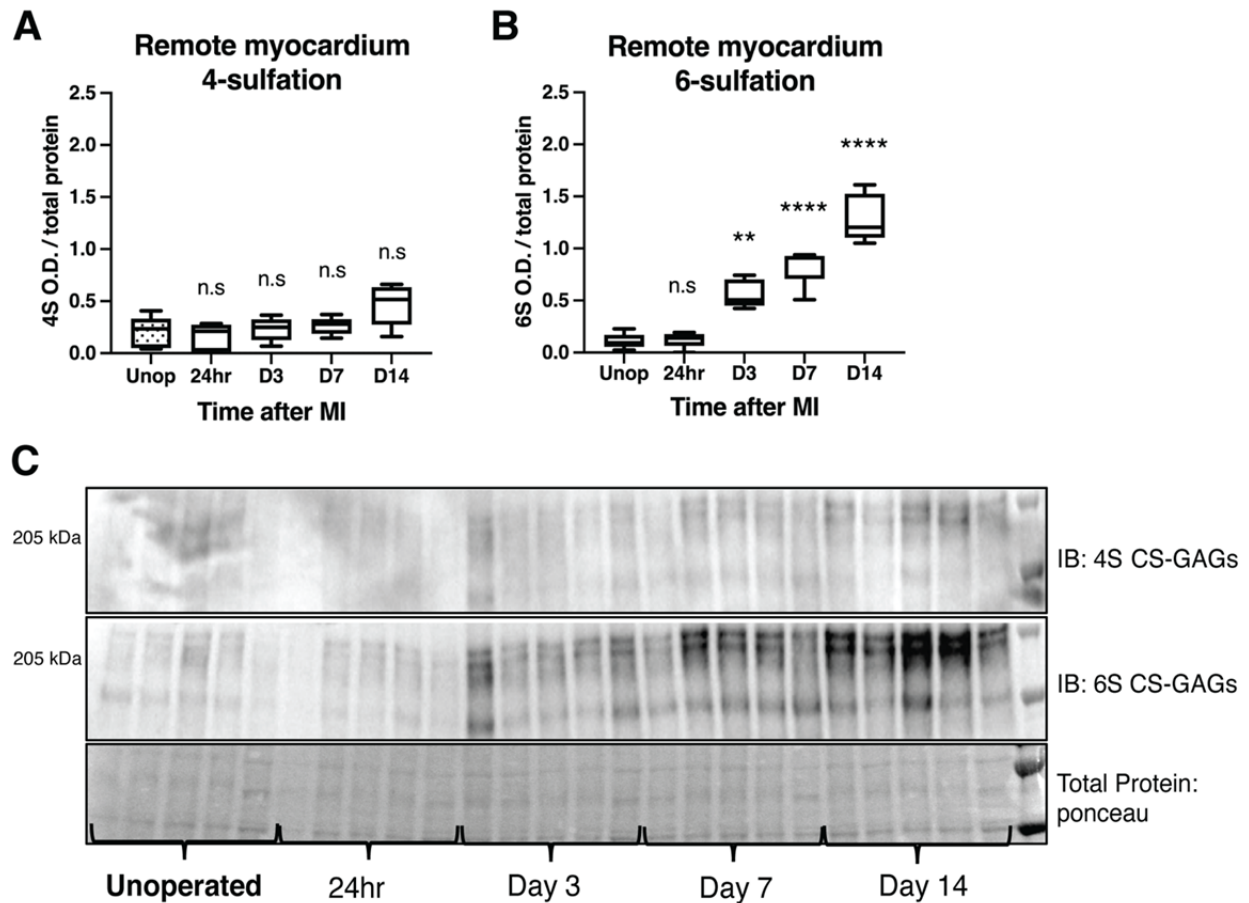

28

29 **Figure 1 - Figure Supplement 1:** Time course of CSPG sulfation in the remote myocardium (non-scar tissue) after  
 30 MI caused by I/R. Western blot quantification of **(A)** 4-sulfation (4S CS-GAGs), Statistics: one-way ANOVA (Tukey's  
 31 post-test), ns- not significant, p-value = 0.989, 0.997, 0.955, 0.053 respectively left to right, comparisons to  
 32 unoperated tissue, n=5 animals per group. **(B)** Western blot quantification of 6-sulfation (6S CS-GAGs). Data are  
 33 mean optical density (O.D.)  $\pm$  SD. Statistics: one-way ANOVA (Tukey's post-test), ns- not significant p-value=0.999,  
 34 \*\*p-value=0.001, \*\*\*\*p-value<0.0001, comparisons to unoperated tissue, n=5 animals per group. **(C)** Example  
 35 western blot images of A and B.

36

37

38

39

40

41

42

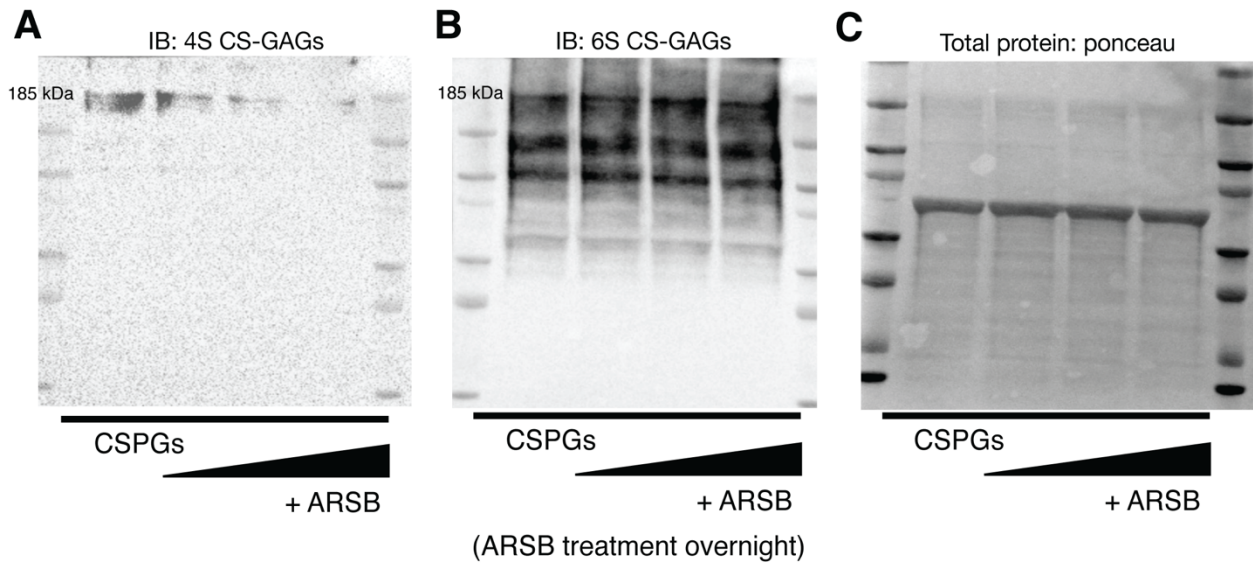

43

44 **Figure 2 - Figure Supplement 1:** ARSB removes 4S CS-GAGs and leaves 6S CS-GAGs intact. **(A)** Western blot of  
 45 4S content using purified CSPGs upon treatment of increasing concentrations of ARSB; vehicle, 0.3 $\mu$ g/mL, 0.6 $\mu$ g/mL,  
 46 and 1.2 $\mu$ g/mL respectively left to right. **(B)** Western blot of 6S using purified CSPGs upon treatment of increasing  
 47 concentrations of ARSB; vehicle, 0.3 $\mu$ g/mL, 0.6 $\mu$ g/mL, and 1.2 $\mu$ g/mL respectively left to right. **(C)** Total protein  
 48 loaded of purified CSPGs treated with increasing concentrations of ARSB; vehicle, 0.3 $\mu$ g/mL, 0.6 $\mu$ g/mL, and  
 49 1.2 $\mu$ g/mL respectively left to right.

50

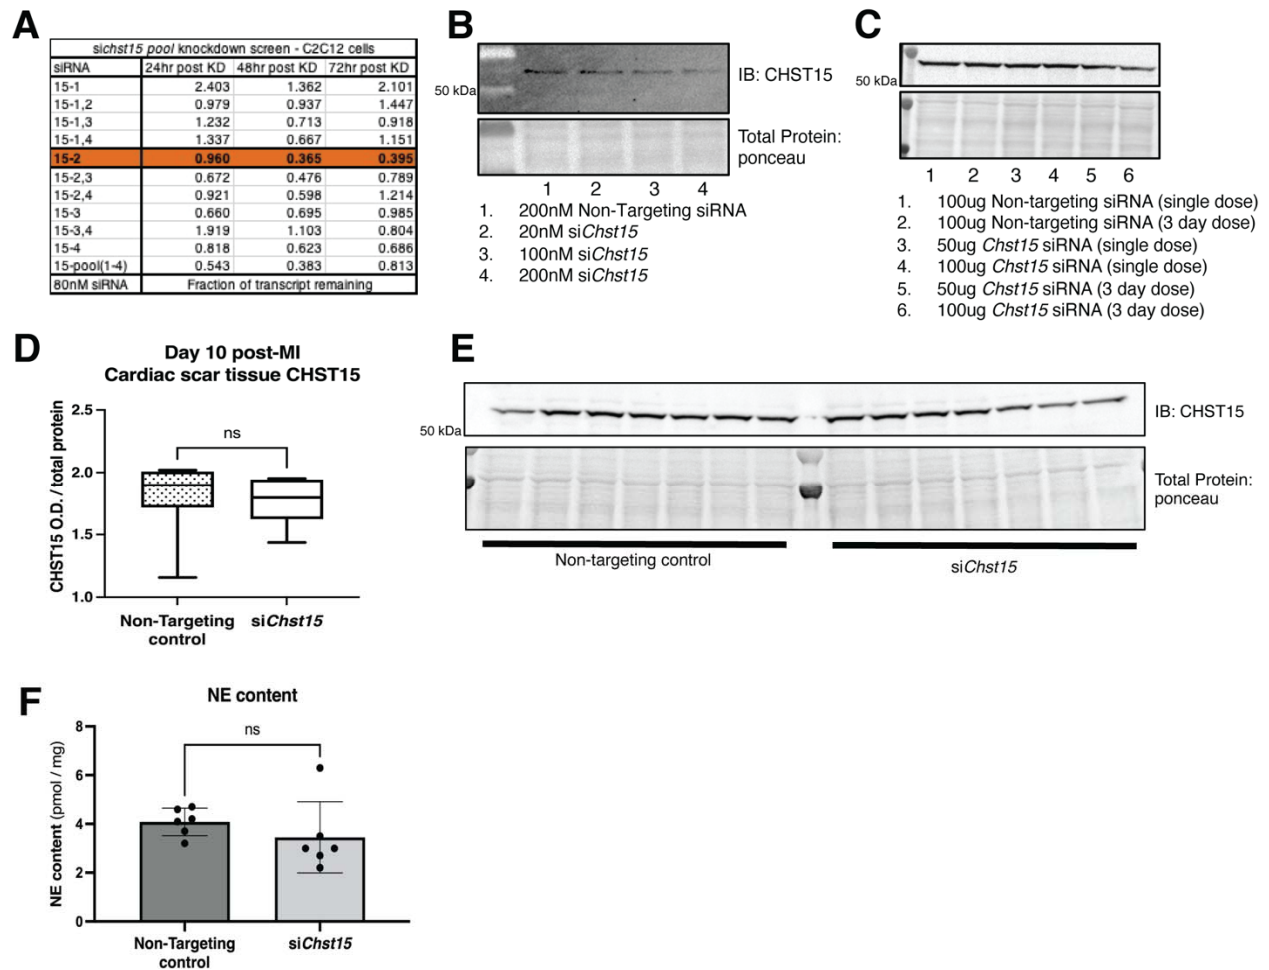

51

52 **Figure 6 - Figure Supplement 1: Identification of an effective siRNA against *Chst15*.** (A) qPCR knockdown of siRNA  
 53 pool in C2C12 cells in 3 days after knockdown. Data shown fraction of transcript remaining, *siChst15-2* was most  
 54 effective in knockdown of *Chst15*. This transcript was selected for *in-vivo* studies (B) Western blot of CHST15 protein  
 55 knockdown in C2C12 cells to confirm efficacy of *siChst15-2*, comparison to Non-Targeting controls (C) Tail vein  
 56 injection in mouse to determine ideal dosing for *in-vivo* *siChst15* knockdown. Western blot of tail vein injection dosing  
 57 trial for *siChst15* with either 1 day or 3 days of injections. CHST15 protein in left ventricle (LV) 48hr after final tail vein  
 58 injection, comparison to Non-targeting controls, all unoperated (non-MI) animals. (D) Full siRNA CHST15  
 59 experimental trial, CHST15 protein expression on D10 post MI quantified, siRNA injection D3, 5, 7 post-MI. Data are  
 60 mean optical density (O.D.)  $\pm$  SD, n=7 animals per treatment group, statistics; student t-test (Welch's test), ns – not  
 61 significant, p-value=0.833. (E) Western blot of CHST15 protein expression D10 post-MI in siRNA treated animals. (F)  
 62 NE content in the cardiac scar following siRNA treatment. NE was not increased with reinnervation, consistent with  
 63 previous studies showing suppression of NE synthesis and reuptake by inflammatory cytokines (Parrish et al., 2010).

- 64 Quantification of n=6 animals for non-targeting controls and *Chst15* siRNA treatment. Data are mean NE content  $\pm$
- 65 SD. Statistics; student t-test (Welch's test), n.s.- not significant, p-value=0.345.
